# Supplementary material for: COVID-19 reduced age differences in social motivation
Source: Frontiers journal article supplement (doi:10.3389/fpsyg.2022.1075814), 2023-01-09
Supplement: Presentation_1.pdf [file Presentation_1.pdf]

## COVID-19 Reduced Age Differences in Social Motivation

### Online Supplemental Materials

In the supplemental material, we provided additional measures and results.

#### METHOD

We measured the extent to which participants thought about the meaning of life in the four samples: “How often, if at all, have you thought about the meaning and purpose of life in the past week?”, 1 = *often*; 4 = *never*). The question was taken from the World Values Survey (Inglehart et al., 2018).

#### RESULT

*Thinking about the meaning and purpose of life.* We reverse-coded the scale so higher numbers indicate greater tendencies to question the meaning and purpose of life. In the first pandemic phase survey, there was not a significant difference by age in the tendency to think about meaning and purpose of life ( $F(2, 251) = 1.29, p = .278$ ) or the pandemic phase replication survey in 2020 ( $F(2, 574) = 1.29, p = .276$ ); nor were age differences observed during the first survey deployed during the vaccination phase ( $F(2, 524) = 0.10, p = .90$ ), at the point when 23% of the population had been vaccinated. Age differences were observed in the fourth survey ( $M_{young} = 3.14, M_{middle-aged} = 3.00, M_{old} = 2.89, F(2, 487) = 4.25, p = .015$ ) after vaccines had become available to all. In the fourth survey, younger adults ( $M_{young} = 3.14$ ) were more likely to question the meaning of life than older adults ( $M_{old} = 2.89, t(340) = 2.86, p = .004$ ). There were no differences between middle-aged and older adults ( $t(279) = 1.17, p = .24$ ), or between younger and middle-age adults ( $t(355) = 1.66, p = .098$ ). As previous research has demonstrated, younger adults typically question the meaning of life more than older adults (Alter and

Hershfield, 2014); these results suggest that as vaccines became widely available, younger adults' preferences gradually resumed to the pre-pandemic level.

### **Additional References**

Alter, A. L., and Hershfield, H. E. (2014). People search for meaning when they approach a new decade in chronological age. *Proceedings of the National Academy of Sciences*, 111(48), 17066-17070.

Inglehart, R., C. Haerpfer, A. Moreno, C. Welzel, K. Kizilova, J. Diez-Medrano, M. Lagos, P. Norris, E. Ponarin & B. Puranen et al. (eds.). 2018. *World Values Survey: Round Six - Country-Pooled Datafile*. Madrid, Spain & Vienna, Austria: JD Systems Institute & WVSA Secretariat. [doi.org/10.14281/18241.8](https://doi.org/10.14281/18241.8)
